# Supplementary material for: Genomic Based Analysis of the Biocontrol Species Trichoderma harzianum: A Model Resource of Structurally Diverse Pharmaceuticals and Biopesticides
Source: MDPI journal article supplement (doi:10.3390/jof9090895), 2023-08-31
Supplement: s1 [file s1]

# Genomic Based Analysis of The Biocontrol Species *Trichoderma harzianum*: A Model Resource of Structurally Diverse Pharmaceuticals and Biopesticides

## Supplementary information

### List of tables

Table S1 represents the predicted core enzymes of the SMs of eighty-seven *Trichoderma* species genomes.

Tables from S1 to S20 represent predicted BGC for Tricho-NRPS

Tables from S21 to S38 represent predicted BGC for Tricho-PKS

Tables from S38 to S40 represent predicted BGC for Tricho-PKS like

Tables from S41 to S46 represent predicted BGC for Tricho-HrPKS

Tables from S47 to S51 represent predicted BGC for Tricho-TC

Table S52 represents predicted BGC for Tricho-DMAT

**Table S1.** *Trichoderma* species and their predicted SMs core enzymes and their associated BGCs.

|    | Trichoderma species                              | DMAT clusters | Hybrid clusters | NRPS clusters | NRPS like clusters | PKS clusters | PKS like clusters | TC clusters | Total core enzymes | Total BGCs |
|----|--------------------------------------------------|---------------|-----------------|---------------|--------------------|--------------|-------------------|-------------|--------------------|------------|
| 1  | <i>Trichoderma arundinaceum</i> IBT 40837        | 0             | 4               | 13            | 9                  | 22           | 3                 | 4           | 55                 | 33         |
| 2  | <i>Trichoderma asperelloides</i> T203 v1.0       | 0             | 1               | 10            | 12                 | 13           | 3                 | 5           | 45                 | 35         |
| 3  | <i>Trichoderma asperelloides</i> TR356 v1.0      | 0             | 3               | 11            | 12                 | 12           | 3                 | 5           | 46                 | 35         |
| 4  | <i>Trichoderma asperellum</i> CBS 433.97 v1.0    | 0             | 2               | 13            | 11                 | 12           | 2                 | 4           | 44                 | 34         |
| 5  | <i>Trichoderma atroviride</i> ITEM 908           | 0             | 2               | 4             | 7                  | 17           | 2                 | 4           | 36                 | 20         |
| 6  | <i>Trichoderma atroviride</i> v2.0               | 0             | 2               | 9             | 10                 | 13           | 2                 | 3           | 39                 | 32         |
| 7  | <i>Trichoderma brevicompactum</i> IBT40841       | 1             | 3               | 18            | 9                  | 27           | 3                 | 6           | 67                 | 43         |
| 8  | <i>Trichoderma citrinoviride</i> TUCIM 6016 v4.0 | 0             | 2               | 8             | 7                  | 10           | 2                 | 4           | 33                 | 24         |
| 9  | <i>Trichoderma gamsii</i> T6085                  | 0             | 1               | 10            | 11                 | 13           | 2                 | 2           | 39                 | 26         |
| 10 | <i>Trichoderma guizhouense</i> NJAU 4742         | 0             | 6               | 12            | 8                  | 20           | 2                 | 6           | 54                 | 41         |
| 11 | <i>Trichoderma hamatum</i> GD12                  | 0             | 2               | 13            | 11                 | 15           | 2                 | 3           | 46                 | 24         |
| 12 | <i>Trichoderma harzianum</i> CBS 226.95 v1.0     | 0             | 5               | 13            | 10                 | 21           | 2                 | 6           | 57                 | 52         |
| 13 | <i>Trichoderma harzianum</i> M10 v1.0            | 1             | 6               | 15            | 10                 | 20           | 3                 | 6           | 61                 | 51         |
| 14 | <i>Trichoderma harzianum</i> T22 v1.0            | 0             | 6               | 15            | 10                 | 19           | 3                 | 6           | 59                 | 48         |

|    |                                             |   |   |    |    |    |   |   |    |    |
|----|---------------------------------------------|---|---|----|----|----|---|---|----|----|
| 15 | Trichoderma harzianum TR274 v1.0            | 0 | 5 | 14 | 9  | 20 | 2 | 6 | 56 | 41 |
| 16 | Trichoderma longibrachiatum ATCC 18648 v3.0 | 0 | 1 | 7  | 5  | 9  | 3 | 3 | 28 | 22 |
| 17 | Trichoderma parareesei CBS 125925           | 0 | 1 | 7  | 6  | 10 | 2 | 4 | 30 | 16 |
| 18 | Trichoderma pleuroti TPhu1                  | 0 | 4 | 13 | 11 | 21 | 3 | 8 | 58 | 40 |
| 19 | Trichoderma reesei CBS999.97 MAT1-1         | 0 | 1 | 8  | 6  | 9  | 2 | 4 | 30 | 23 |
| 20 | Trichoderma reesei CBS999.97 MAT1-2         | 0 | 1 | 7  | 7  | 8  | 2 | 4 | 29 | 22 |
| 21 | Trichoderma reesei QM6a                     | 0 | 1 | 8  | 5  | 10 | 2 | 4 | 30 | 19 |
| 22 | Trichoderma reesei RUT C-30 v1.0            | 0 | 2 | 8  | 5  | 8  | 2 | 4 | 29 | 21 |
| 23 | Trichoderma reesei v2.0                     | 0 | 2 | 8  | 5  | 9  | 2 | 4 | 30 | 20 |

**Table S2.** Tricho-NRPS1 Predicted BGC.

| Tricho-NRPS1<br>Predicted BGC |                           |                   |                      |                       |                    |                  |                    |
|-------------------------------|---------------------------|-------------------|----------------------|-----------------------|--------------------|------------------|--------------------|
| Protein ID                    | 1                         | 2                 | 3                    | 4                     | 5                  | 6                | 7                  |
|                               | 515467                    | 476182            | 412883               | 505529                | 505532             | 515469           | 439904             |
| Function                      | Short chain dehydrogenase | N-terminal domain | Transcription factor | Alcohol dehydrogenase | PKS with 6 domains | TAP like protein | Phosphotransferase |

**Table S3.** Tricho-NRPS2 Predicted BGC.

| Tricho-NRPS2<br>Predicted BGC |                      |                          |                    |
|-------------------------------|----------------------|--------------------------|--------------------|
| Protein ID                    | 1                    | 2                        | 3                  |
|                               | 180300               | 180295                   | 356455             |
| Function                      | Transcription factor | L-lysine 6 monooxygenase | AMP binding enzyme |

**Table S4.** Tricho-NRPS3 Predicted BGC.

| Tricho-NRPS3<br>Predicted BGC |                    |                      |                    |                   |                   |                                               |                      |                 |
|-------------------------------|--------------------|----------------------|--------------------|-------------------|-------------------|-----------------------------------------------|----------------------|-----------------|
| Protein ID                    | 1                  | 2                    | 3                  | 4                 | 5                 | 6                                             | 7                    | 8               |
|                               | 188187             | 188218               | 514122             | 474580            | 435587            | 474582                                        | 188396               | 451994          |
| Function                      | AMP-binding enzyme | Hypothetical protein | AMP-binding enzyme | Acetyltransferase | Major facilitator | Pyridine nucleotide disulphide oxidoreductase | Hypothetical protein | ABC transporter |

**Table S5.** Tricho-NRPS4 Predicted BGC.

| Tricho-NRPS4<br>Predicted BGC |                                               |                 |                     |                 |                 |                      |                           |                      |                      |                    |                 |                  |
|-------------------------------|-----------------------------------------------|-----------------|---------------------|-----------------|-----------------|----------------------|---------------------------|----------------------|----------------------|--------------------|-----------------|------------------|
| Protein ID                    | 1                                             | 2               | 3                   | 4               | 5               | 6                    | 7                         | 8                    | 9                    | 10                 | 11              | 12               |
|                               | 351544                                        | 496372          | 496373              | 496375          | 351473          | 496384               | 351445                    | 496401               | 449706               | 496410             | 472653          | 351441           |
| Function                      | Pyridine nucleotide disulphide oxidoreductase | Cytochrome P450 | O-methyltransferase | ABC transporter | Cytochrome P450 | Hypothetical protein | Glutathione S-transferase | Membrane dipeptidase | Hypothetical protein | NRP with 4 domains | Cytochrome P450 | aminotransferase |

**Table S6.** Tricho-NRPS5 Predicted BGC.

| Tricho-NRPS5<br>Predicted BGC |             |                     |                 |             |                      |                 |                    |
|-------------------------------|-------------|---------------------|-----------------|-------------|----------------------|-----------------|--------------------|
| Protein ID                    | 1           | 2                   | 3               | 4           | 5                    | 6               | 7                  |
|                               | 338536      | 418640              | 338363          | 495778      | 123919               | 495780          | 495783             |
| Function                      | FAD binding | Aldo/keto reductase | Cytochrome P450 | FAD binding | Transcription factor | Cytochrome P450 | NRP with 3 domains |

Table S7. Tricho-NRPS7 Predicted BGC.

| Tricho-NRPS7<br>Predicted BGC |                 |                      |                 |                 |                      |                             |                      |                    |                      |                   |                      |                      |                      |                    |                      |                           |                                     |
|-------------------------------|-----------------|----------------------|-----------------|-----------------|----------------------|-----------------------------|----------------------|--------------------|----------------------|-------------------|----------------------|----------------------|----------------------|--------------------|----------------------|---------------------------|-------------------------------------|
| Protein ID                    | 1               | 2                    | 3               | 4               | 5                    | 6                           | 7                    | 8                  | 9                    | 10                | 11                   | 12                   | 13                   | 14                 | 15                   | 16                        | 17                                  |
|                               | 419706          | 173371               | 468462          | 340094          | 508977               | 500083                      | 517847               | 478762             | 419717               | 468468            | 517850               | 500099               | 173458               | 173469             | 500108               | 173494                    | 419727                              |
| Function                      | ABC transporter | Hypothetical protein | Cytochrome P450 | Cytochrome P450 | Hypothetical protein | Indoleamine 2,3-dioxygenase | Hypothetical protein | NRP with 4 domains | Alpha-beta hydrolase | Major facilitator | Hypothetical protein | Hypothetical protein | Hypothetical protein | NAD binding domain | Transcription factor | Phytanoyl-CoA dioxygenase | NAD dependent epimerase/dehydratase |

Table S8. Tricho-NRPS8 Predicted BGC.

| Tricho-NRPS8<br>Predicted BGC |                   |                      |                             |                    |        |
|-------------------------------|-------------------|----------------------|-----------------------------|--------------------|--------|
| Protein ID                    | 1                 | 2                    | 3                           | 4                  | 5      |
|                               | 419041            | 498049               | 393322                      | 508707             | 498051 |
| Function                      | Major facilitator | Hypothetical protein | Polysaccharide biosynthesis | NRP with 4 domains | NRPS   |

Table S9. Tricho-NRPS11 Predicted BGC.

| Tricho-NRPS11<br>Predicted BGC |        |       |        |        |        |        |
|--------------------------------|--------|-------|--------|--------|--------|--------|
| Protein ID                     | 1      | 2     | 3      | 4      | 5      | 6      |
|                                | 477104 | 35437 | 415197 | 489837 | 487119 | 489848 |

|          |                             |     |                      |                    |                 |             |
|----------|-----------------------------|-----|----------------------|--------------------|-----------------|-------------|
| Function | Fungal transcription factor | SDS | Hypothetical protein | NRP with 4 domains | ABC transporter | AMP binding |
|----------|-----------------------------|-----|----------------------|--------------------|-----------------|-------------|

**Table S10.** Tricho-NRPS12 Predicted BGC.

| Tricho-NRPS12<br>Predicted BGC |          |                 |                     |                  |           |                    |                           |
|--------------------------------|----------|-----------------|---------------------|------------------|-----------|--------------------|---------------------------|
| Protein ID                     | 1        | 2               | 3                   | 4                | 5         | 6                  | 7                         |
|                                | 504003   | 360465          | 360482              | 411624           | 465207    | 525012             | 321479                    |
| Function                       | Zn(2)Cys | ABC transporter | Peptide transporter | aminotransferase | Peptidase | NRP with 6 domains | Short chain dehydrogenase |

**Table S11.** Tricho-NRPS13 Predicted BGC.

| Tricho-NRPS13<br>Predicted BGC |                 |                      |                                |                    |                      |                 |                              |                   |                           |                      |                   |
|--------------------------------|-----------------|----------------------|--------------------------------|--------------------|----------------------|-----------------|------------------------------|-------------------|---------------------------|----------------------|-------------------|
| Protein ID                     | 1               | 2                    | 3                              | 4                  | 5                    | 6               | 7                            | 8                 | 9                         | 10                   | 11                |
|                                | 502851          | 215460               | 385558                         | 502872             | 385564               | 514734          | 464778                       | 215503            | 437689                    | 502879               | 475307            |
| Function                       | Cytochrome P450 | Transcription factor | Pyridine nucleotide disulphide | AMP binding enzyme | Hypothetical protein | ABC transporter | Enol-CoA hydratase/isomerase | Major facilitator | Short chain dehydrogenase | Hypothetical protein | Major facilitator |

|  |  |  |                          |  |  |  |  |  |  |  |  |
|--|--|--|--------------------------|--|--|--|--|--|--|--|--|
|  |  |  | de<br>oxidore<br>ductase |  |  |  |  |  |  |  |  |
|--|--|--|--------------------------|--|--|--|--|--|--|--|--|

Table S12. Tricho-NRPS14 Predicted BGC.

| Tricho-NRPS14<br>Predicted BGC |                        |                         |                       |                         |                       |
|--------------------------------|------------------------|-------------------------|-----------------------|-------------------------|-----------------------|
| Protein<br>ID                  | 1                      | 2                       | 3                     | 4                       | 5                     |
|                                | 359352                 | 410736                  | 359428                | 524679                  | 385620                |
| Function                       | Amino acid<br>permease | Transcription<br>factor | Glycosyl<br>hydrolase | Hypothetical<br>protein | NRP with 3<br>domains |

Table S13. Tricho-NRPS15 Predicted BGC.

| Tricho-NRPS15<br>Predicted BGC |                             |                              |                               |                          |                               |                               |                           |                             |                                |
|--------------------------------|-----------------------------|------------------------------|-------------------------------|--------------------------|-------------------------------|-------------------------------|---------------------------|-----------------------------|--------------------------------|
| Protein<br>ID                  | 1                           | 2                            | 3                             | 4                        | 5                             | 6                             | 7                         | 8                           | 9                              |
|                                | 358358                      | 436838                       | 464438                        | 502361                   | 436848                        | 436850                        | 452487                    | 514490                      | 502372                         |
| Function                       | Transcrip<br>tion<br>factor | Phosphat<br>ase<br>catalytic | Hypothes<br>etical<br>protein | NRP with<br>4<br>domains | Hypothes<br>etical<br>protein | Hypothes<br>etical<br>protein | Cys/Met<br>metabolis<br>m | O-<br>methyltra<br>nsferase | Metallo-<br>beta-<br>lactamase |

Table S14. Tricho-NRPS-Like2 Predicted BGC.

| Tricho-NRPS-Like2<br>Predicted BGC |                 |            |                       |                     |                      |                   |                          |                           |                      |              |                   |                        |
|------------------------------------|-----------------|------------|-----------------------|---------------------|----------------------|-------------------|--------------------------|---------------------------|----------------------|--------------|-------------------|------------------------|
| Protein ID                         | 1               | 2          | 3                     | 4                   | 5                    | 6                 | 7                        | 8                         | 9                    | 10           | 11                | 12                     |
|                                    | 408559          | 451842     | 356753                | 474446              | 185283               | 356690            | 463816                   | 383423                    | 500937               | 435306       | 500939            | 500943                 |
| Function                           | Cytochrome P450 | F-box like | Protein kinase domain | Aldo-keto reductase | Transcription factor | Major facilitator | NRPs-like with 4 domains | Glutathione S-transferase | Alpha/beta hydrolase | hypothetical | Sugar transporter | Zn(2)-Cys(6) binuclear |

Table S15. Tricho-NRPS-Like4 Predicted BGC.

| Tricho-NRPS-Like4<br>Predicted BGC |             |                   |                     |                  |                 |                      |                   |                                     |
|------------------------------------|-------------|-------------------|---------------------|------------------|-----------------|----------------------|-------------------|-------------------------------------|
| Protein ID                         | 1           | 2                 | 3                   | 4                | 5               | 6                    | 7                 | 8                                   |
|                                    | 464044      | 409062            | 501348              | 524034           | 383932          | 501353               | 357428            | 501356                              |
| Function                           | FAD binding | Major facilitator | NRPs with 3 domains | aminotransferase | Arginase family | Hypothetical protein | Major facilitator | NAD dependent epimerase/dehydratase |

Table S16. Tricho-NRPS-Like5 Predicted BGC.

| Tricho-NRPS-Like5<br>Predicted BGC |                 |                      |                     |                |                      |               |                    |                               |                   |                   |                          |                      |                  |                   |                  |                                      |                   |             |                    |                              |                 |
|------------------------------------|-----------------|----------------------|---------------------|----------------|----------------------|---------------|--------------------|-------------------------------|-------------------|-------------------|--------------------------|----------------------|------------------|-------------------|------------------|--------------------------------------|-------------------|-------------|--------------------|------------------------------|-----------------|
| Protein                            | 1               | 2                    | 3                   | 4              | 5                    | 6             | 7                  | 8                             | 9                 | 10                | 11                       | 12                   | 13               | 14                | 15               | 16                                   | 17                | 18          | 19                 | 20                           | 21              |
| ID                                 | 382256          | 434214               | 513631              | 434215         | 407409               | 382269        | 407415             | 434218                        | 434219            | 499572            | 499574                   | 499579               | 407425           | 434224            | 434225           | 451301                               | 473985            | 434231      | 434233             | 499609                       | 168848          |
| Function                           | NADH(P) binding | Alpha-beta hydrolase | Aldo-keto reductase | Amidohydrolase | Hypothetical protein | Cytochrome b5 | FAD binding domain | Fungal Zn(2)-Cys(6) binuclear | Major facilitator | Major facilitator | NRPs like with 3 domains | Hypothetical protein | NmrA-like family | Major facilitator | NmrA-like family | Enoyl-Acyl carrier protein reductase | FR47-like protein | FAD binding | Pyoverdine protein | DNA repair metallo-lactamase | Cytochrome P450 |

Table S17. Tricho-NRPS-Like6 Predicted BGC.

| Tricho-NRPS-Like6<br>Predicted BGC |                     |                                  |                   |                          |                               |                      |           |                 |                           |                      |                     |                      |
|------------------------------------|---------------------|----------------------------------|-------------------|--------------------------|-------------------------------|----------------------|-----------|-----------------|---------------------------|----------------------|---------------------|----------------------|
| Protein                            | 1                   | 2                                | 3                 | 4                        | 5                             | 6                    | 7         | 8               | 9                         | 10                   | 11                  | 12                   |
| ID                                 | 483855              | 406560                           | 406563            | 498918                   | 433222                        | 354387               | 462878    | 406571          | 450870                    | 161723               | 433238              | 433239               |
| Function                           | Amino acid permease | Taurine catabolism dehydrogenase | Major facilitator | NRPs like with 4 domains | Fungal Zn(2)-Cys(6) binuclear | Glycosyl transferase | Sulfatase | Phosphoesterase | Glutathione S-transferase | Transcription factor | Phosphoribulokinase | Transcription factor |



**Table S18.** Tricho-NRPS-Like7 Predicted BGC.

| Tricho-NRPS-Like7<br>Predicted BGC |                          |                      |                      |                |                             |
|------------------------------------|--------------------------|----------------------|----------------------|----------------|-----------------------------|
| Protein ID                         | 1                        | 2                    | 3                    | 4              | 5                           |
|                                    | 432635                   | 405996               | 432638               | 522823         | 432644                      |
| Function                           | NRPS like with 5 domains | Arylsulfotransferase | Hypothetical protein | RNA polymerase | Fungal transcription factor |

**Table S19.** Tricho-NRPS-Like8 Predicted BGC.

| Tricho-NRPS-Like8<br>Predicted BGC |                         |        |                    |                              |                |              |                      |                          |                         |                               |                   |                            |                     |
|------------------------------------|-------------------------|--------|--------------------|------------------------------|----------------|--------------|----------------------|--------------------------|-------------------------|-------------------------------|-------------------|----------------------------|---------------------|
| Protein ID                         | 1                       | 2      | 3                  | 4                            | 5              | 6            | 7                    | 8                        | 9                       | 10                            | 11                | 12                         | 13                  |
|                                    | 482042                  | 521159 | 471688             | 98880                        | 98861          | 98860        | 482048               | 376679                   | 428608                  | 99051                         | 471696            | 448562                     | 99018               |
| Function                           | NAD dependent epimerase | Rgp1   | Phosphotransferase | Fe(II) oxygenase superfamily | Amidohydrolase | DNA-J domain | Alpha/beta hydrolase | NRPS like with 4 domains | Amino methyltransferase | Fungal Zn(2)-Cys(6) binuclear | Major facilitator | NADH-flavin oxidoreductase | Amino acid permease |

Table S20. Tricho-NRPS-Like9 Predicted BGC.

| Tricho-NRPS-Like9<br>Predicted BGC |                         |                      |                      |                      |                   |                      |                           |                          |                   |                  |            |                      |                                               |
|------------------------------------|-------------------------|----------------------|----------------------|----------------------|-------------------|----------------------|---------------------------|--------------------------|-------------------|------------------|------------|----------------------|-----------------------------------------------|
| Protein ID                         | 1                       | 2                    | 3                    | 4                    | 5                 | 6                    | 7                         | 8                        | 9                 | 10               | 11         | 12                   | 13                                            |
|                                    | 521230                  | 100953               | 376845               | 349373               | 482117            | 460771               | 376849                    | 402025                   | 471766            | 402033           | 349104     | 101004               | 521239                                        |
| Function                           | Short chain dehydratase | Hypothetical protein | Hypothetical protein | Hypothetical protein | Major facilitator | Alpha-beta hydrolase | Alcohol acetyltransferase | NRPS like with 5 domains | Major facilitator | MaoC dehydratase | CoA-ligase | Hypothetical protein | Pyridine nucleotide disulphide oxidoreductase |

Table S21. Tricho-PKS1 Predicted BGC.

| Tricho-PKS1<br>Predicted BGC |             |                    |
|------------------------------|-------------|--------------------|
| Protein ID                   | 1           | 2                  |
|                              | 499215      | 499219             |
| Function                     | AMP binding | PKS with 9 domains |

**Table S22.** Tricho-PKS2 Predicted BGC.

| Tricho-PKS2<br>Predicted BGC |                               |                                                               |                      |                     |                          |                    |
|------------------------------|-------------------------------|---------------------------------------------------------------|----------------------|---------------------|--------------------------|--------------------|
| Protein ID                   | 1                             | 2                                                             | 3                    | 4                   | 5                        | 6                  |
|                              | 164603                        | 164607                                                        | 164644               | 433750              | 164697                   | 381909             |
| Function                     | Fungal Zn(2)-Cys(6) binuclear | Glutathione-<br>dependent<br>formaldehyde-<br>activity enzyme | Hypothetical protein | O-methyltransferase | Scylatone<br>dehydratase | PKS with 5 domains |

**Table S23.** Tricho-PKS3 Predicted BGC.

| Tricho-PKS3<br>Predicted BGC |                             |                                 |                            |                                     |                                         |                       |                          |                  |                       |                        |
|------------------------------|-----------------------------|---------------------------------|----------------------------|-------------------------------------|-----------------------------------------|-----------------------|--------------------------|------------------|-----------------------|------------------------|
| Protein ID                   | 1                           | 2                               | 3                          | 4                                   | 5                                       | 6                     | 7                        | 8                | 9                     | 10                     |
|                              | 483114                      | 431297                          | 431298                     | 496821                              | 522268                                  | 136284                | 404601                   | 404602           | 379445                | 512670                 |
| Function                     | O-<br>methyltra<br>nsferase | Methyltra<br>nsferase<br>domain | Alpha<br>beta<br>hydrolase | Short<br>chain<br>dehydrog<br>enase | Fungal<br>Zn(2)-<br>Cys(6)<br>binuclear | PKS with<br>5 domains | FAD<br>binding<br>domain | Thioester<br>ase | PKS with<br>5 domains | ABC<br>transporte<br>r |

**Table S24.** Tricho-PKS4 Predicted BGC.

| Tricho-PKS4<br>Predicted BGC |                 |                         |                       |                         |                                       |                        |
|------------------------------|-----------------|-------------------------|-----------------------|-------------------------|---------------------------------------|------------------------|
| Protein ID                   | 1               | 2                       | 3                     | 4                       | 5                                     | 6                      |
|                              | 522072          | 404130                  | 482934                | 430881                  | 430885                                | 522077                 |
| Function                     | Cytochrome P450 | Lipase<br>Acylhydrolase | PKS with 6<br>domains | Hypothetical<br>protein | Pyridine<br>nucleotide-<br>disulphide | FAD binding<br>protein |

**Table S25.** Tricho-PKS5 Predicted BGC.

| Tricho-PKS5<br>Predicted BGC |                |                       |                          |                                              |                         |                                                           |                          |                             |                          |                            |                                                           |                           |                          |
|------------------------------|----------------|-----------------------|--------------------------|----------------------------------------------|-------------------------|-----------------------------------------------------------|--------------------------|-----------------------------|--------------------------|----------------------------|-----------------------------------------------------------|---------------------------|--------------------------|
| Protein ID                   | 1              | 2                     | 3                        | 4                                            | 5                       | 6                                                         | 7                        | 8                           | 9                        | 10                         | 11                                                        | 12                        | 13                       |
|                              | 431418         | 462073                | 136943                   | 431422                                       | 496982                  | 404776                                                    | 431425                   | 431427                      | 497001                   | 522355                     | 352294                                                    | 431433                    | 431434                   |
| Function                     | FAD<br>binding | Methyltr<br>ansferase | Major<br>facilitato<br>r | Taurine<br>catabolis<br>m<br>dioxygen<br>ase | NmrA-<br>Like<br>family | Pyridoxa<br>l<br>phosphat<br>e<br>depende<br>nt<br>enzyme | Major<br>facilitato<br>r | Hypothe<br>tical<br>protein | PKS with<br>7<br>domains | Multicop<br>per<br>oxidase | Fungal<br>chitosana<br>se of<br>glycosyl<br>hydrolas<br>e | GMC<br>oxidored<br>uctase | Major<br>facilitato<br>r |

**Table S26.** Tricho-PKS6 Predicted BGC.

| Tricho-PKS6<br>Predicted BGC |                   |                 |                  |                    |                           |                      |             |                    |
|------------------------------|-------------------|-----------------|------------------|--------------------|---------------------------|----------------------|-------------|--------------------|
| Protein ID                   | 1                 | 2               | 3                | 4                  | 5                         | 6                    | 7           | 8                  |
|                              | 442855            | 477362          | 390772           | 365481             | 48567                     | 442869               | 442870      | 491174             |
| Function                     | Major facilitator | Cytochrome P450 | Serine hydrolase | PKS with 8 domains | Short chain dehydrogenase | Aflatoxin regulatory | FAD binding | PKS with 4 domains |

**Table S27.** Tricho-PKS7 Predicted BGC.

| Tricho-PKS7<br>Predicted BGC |                 |                         |                |                      |                    |
|------------------------------|-----------------|-------------------------|----------------|----------------------|--------------------|
| Protein ID                   | 1               | 2                       | 3              | 4                    | 5                  |
|                              | 443029          | 487562                  | 336484         | 487566               | 391037             |
| Function                     | DSS1/SEM family | Phosphoglycerate kinase | Mpv/PMP family | Hypothetical protein | PKS with 3 domains |

**Table S28.** Tricho-PKS8 Predicted BGC.

| Tricho-PKS8<br>Predicted BGC |                           |                      |                      |                 |                  |                    |
|------------------------------|---------------------------|----------------------|----------------------|-----------------|------------------|--------------------|
| Protein ID                   | 1                         | 2                    | 3                    | 4               | 5                | 6                  |
|                              | 78633                     | 417363               | 417370               | 455782          | 455783           | 392064             |
| Function                     | Short chain dehydrogenase | Hypothetical protein | Hypothetical protein | Cytochrome P450 | Serine hydrolase | PKS with 9 domains |

**Table S29.** Tricho-PKS9 Predicted BGC.

| Tricho-PKS9<br>Predicted BGC |                 |                   |                    |                 |                  |
|------------------------------|-----------------|-------------------|--------------------|-----------------|------------------|
| Protein ID                   | 1               | 2                 | 3                  | 4               | 5                |
|                              | 417581          | 417583            | 80976              | 392266          | 455895           |
| Function                     | Cytochrome P450 | Methyltransferase | PKS with 8 domains | Cytochrome P450 | Series hydrolase |

**Table S30.** Tricho-PKS10 Predicted BGC.

| Tricho-PKS10<br>Predicted BGC |                               |                      |                   |                                     |                  |                  |             |                   |                    |                                      |                       |                   |                      |             |                    |                    |
|-------------------------------|-------------------------------|----------------------|-------------------|-------------------------------------|------------------|------------------|-------------|-------------------|--------------------|--------------------------------------|-----------------------|-------------------|----------------------|-------------|--------------------|--------------------|
| Protein ID                    | 1                             | 2                    | 3                 | 4                                   | 5                | 6                | 7           | 8                 | 9                  | 10                                   | 11                    | 12                | 13                   | 14          | 15                 | 16                 |
|                               | 517516                        | 456395               | 368040            | 339163                              | 456398           | 444138           | 508690      | 508691            | 508692             | 339351                               | 419016                | 393288            | 419019               | 456407      | 148593             | 419022             |
| Function                      | Fungal Zn(2)-Cys(6) binuclear | Hypothetical protein | Major facilitator | NAD dependent epimerase/dehydratase | Carboxylesterase | Carboxylesterase | FAD binding | Snoal-Like domain | PKS with 7 domains | Fungal specific transcription factor | Alcohol dehydrogenase | Major facilitator | Hypothetical protein | FAD binding | PKS with 7 domains | Transferase family |

**Table S31.** Tricho-PKS11 Predicted BGC.

| Tricho-PKS11<br>Predicted BGC |                  |                       |                           |                   |                      |                                  |                    |                 |                       |                           |             |                     |
|-------------------------------|------------------|-----------------------|---------------------------|-------------------|----------------------|----------------------------------|--------------------|-----------------|-----------------------|---------------------------|-------------|---------------------|
| Protein ID                    | 1                | 2                     | 3                         | 4                 | 5                    | 6                                | 7                  | 8               | 9                     | 10                        | 11          | 12                  |
|                               | 517695           | 498336                | 498339                    | 393702            | 498346               | 444345                           | 152317             | 419428          | 517699                | 152338                    | 419430      | 498351              |
| Function                      | NmrA-like family | Rhodanese-like domain | NADPH dependent reductase | Methyltransferase | Hypothetical protein | Pyridine nucleotide - disulphide | PKS with 7 domains | Cytochrome P450 | Alcohol dehydrogenase | Short chain dehydrogenase | FAD binding | Enoyl-CoA hydratase |

**Table S32.** Tricho-PKS12 Predicted BGC.

| Tricho-PKS12<br>Predicted BGC |             |                                      |                  |                              |                  |                    |                        |                     |                                |                      |                 |
|-------------------------------|-------------|--------------------------------------|------------------|------------------------------|------------------|--------------------|------------------------|---------------------|--------------------------------|----------------------|-----------------|
| Protein ID                    | 1           | 2                                    | 3                | 4                            | 5                | 6                  | 7                      | 8                   | 9                              | 10                   | 11              |
|                               | 393773      | 393776                               | 368547           | 508872                       | 419484           | 498453             | 498459                 | 468330              | 419489                         | 419490               | 517733          |
| Function                      | FAD binding | Fungal specific transcription factor | NmrA-Like family | Fe(II) oxygenase superfamily | Serine hydrolase | PKS with 6 domains | Metallo-beta-lactamase | Tetrapeptide repeat | Pyridine nucleotide-disulphide | Hypothetical protein | Cytochrome P450 |

**Table S33.** Tricho-PKS13 Predicted BGC.

| Tricho-PKS13<br>Predicted BGC |                    |                     |                     |                                |            |                                        |
|-------------------------------|--------------------|---------------------|---------------------|--------------------------------|------------|----------------------------------------|
| Protein ID                    | 1                  | 2                   | 3                   | 4                              | 5          | 6                                      |
|                               | 255874             | 255870              | 469409              | 255932                         | 255926     | 422265                                 |
| Function                      | PKS with 8 domains | Glycosyltransferase | Intron endonuclease | Taurine catabolism dioxygenase | SGC domain | Prenyltransferase and squalene oxidase |



Table S34. Tricho-PKS15 Predicted BGC.

| Tricho-PKS15<br>Predicted BGC |                     |                    |
|-------------------------------|---------------------|--------------------|
| Protein ID                    | 1                   | 2                  |
|                               | 14131               | 479825             |
| Function                      | O-methyltransferase | PKS with 5 domains |

Table S35. Tricho-PKS17 Predicted BGC.

| Tricho-PKS17<br>Predicted BGC |                           |                      |                      |                                      |                  |                           |         |                    |                 |                     |                 |                 |                        |
|-------------------------------|---------------------------|----------------------|----------------------|--------------------------------------|------------------|---------------------------|---------|--------------------|-----------------|---------------------|-----------------|-----------------|------------------------|
| Protein ID                    | 1                         | 2                    | 3                    | 4                                    | 5                | 6                         | 7       | 8                  | 9               | 10                  | 11              | 12              | 13                     |
|                               | 364464                    | 489695               | 364451               | 34389                                | 364477           | 487058                    | 489706  | 389951             | 489715          | 389954              | 516189          | 442169          | 489737                 |
| Function                      | Short chain dehydrogenase | Hypothetical protein | Hypothetical protein | Fungal specific transcription factor | NmrA-like family | Glutathione S-transferase | Amidase | PKS with 8 domains | Cytochrome P450 | O-methyltransferase | Cytochrome P450 | Cytochrome P450 | Metallo-beta-lactamase |

**Table S36.** Tricho-PKS18 Predicted BGC.

| Tricho-PKS18<br>Predicted BGC |                  |                    |
|-------------------------------|------------------|--------------------|
| Protein ID                    | 1                | 2                  |
|                               | 228413           | 411257             |
| Function                      | Serine hydrolase | PKS with 7 domains |

**Table S37.** Tricho-PKS19 Predicted BGC.

| Tricho-PKS19<br>Predicted BGC |                           |                               |                   |                           |                           |                  |             |              |                           |             |                 |                           |                    |                    |
|-------------------------------|---------------------------|-------------------------------|-------------------|---------------------------|---------------------------|------------------|-------------|--------------|---------------------------|-------------|-----------------|---------------------------|--------------------|--------------------|
| Protein ID                    | 1                         | 2                             | 3                 | 4                         | 5                         | 6                | 7           | 8            | 9                         | 10          | 11              | 12                        | 13                 | 14                 |
|                               | 437247                    | 464615                        | 358912            | 475157                    | 211896                    | 211902           | 502627      | 475161       | 410349                    | 502630      | 502631          | 358864                    | 410352             | 358773             |
| Function                      | Short chain dehydrogenase | Fungal Zn(2)-Cys(6) binuclear | Major facilitator | Short chain dehydrogenase | Short chain dehydrogenase | tRNA synthetases | FAD binding | Cupin domain | Short chain dehydrogenase | FAD binding | Cytochrome P450 | Short chain dehydrogenase | Enoyl-Acyl carrier | PKS with 7 domains |

Table S38. Tricho-PKS20 Predicted BGC.

| Tricho-PKS20<br>Predicted BGC |                    |                      |                      |                    |                 |                 |
|-------------------------------|--------------------|----------------------|----------------------|--------------------|-----------------|-----------------|
| Protein ID                    | 1                  | 2                    | 3                    | 4                  | 5               | 6               |
|                               | 502963             | 502967               | 502971               | 485477             | 437743          | 410755          |
| Function                      | PKS with 5 domains | Hypothetical protein | Hypothetical protein | PKS with 4 domains | ABC transporter | ABC transporter |

Table S39. Tricho-PKS like1 Predicted BGC.

| Tricho-PKS like1<br>Predicted BGC |                                               |                             |                       |                            |                            |                          |                                  |               |                         |                                               |
|-----------------------------------|-----------------------------------------------|-----------------------------|-----------------------|----------------------------|----------------------------|--------------------------|----------------------------------|---------------|-------------------------|-----------------------------------------------|
| Protein ID                        | 1                                             | 2                           | 3                     | 4                          | 5                          | 6                        | 7                                | 8             | 9                       | 10                                            |
|                                   | 194678                                        | 436232                      | 436236                | 384256                     | 327515                     | 357742                   | 484956                           | 194785        | 464192                  | 357801                                        |
| Function                          | Fungal<br>specific<br>transcription<br>factor | Oligopeptide<br>transporter | PKS with 2<br>domains | Ubiquinol-<br>Cytochrome C | Dihydrofolate<br>reductase | DSBA like<br>thioredoxin | Short chain<br>dehydrogenas<br>e | ATPase family | Hypothetical<br>protein | Fungal<br>specific<br>transcription<br>factor |

Table S40. Tricho-PKS like2 Predicted BGC.

| Tricho-PKS like2<br>Predicted BGC |                                      |                      |                 |                  |                    |            |                           |                   |                                       |
|-----------------------------------|--------------------------------------|----------------------|-----------------|------------------|--------------------|------------|---------------------------|-------------------|---------------------------------------|
| Protein ID                        | 1                                    | 2                    | 3               | 4                | 5                  | 6          | 7                         | 8                 | 9                                     |
|                                   | 169707                               | 451343               | 434338          | 463339           | 484249             | 434343     | 513680                    | 169766            | 434346                                |
| Function                          | Fungal specific transcription factor | Hypothetical protein | Amidohydro lase | Acyltransfer ase | PKS with 4 domains | LSM domain | Pentatricope ptide repeat | Major facilitator | Fungal Zn(2)-Cys(6) binuclear cluster |

Table S41. Tricho-PKS like3 Predicted BGC.

| Tricho-PKS like3<br>Predicted BGC |                  |                        |                  |                    |                    |                      |                     |                      |                          |                       |                           |                                       |
|-----------------------------------|------------------|------------------------|------------------|--------------------|--------------------|----------------------|---------------------|----------------------|--------------------------|-----------------------|---------------------------|---------------------------------------|
| Protein ID                        | 1                | 2                      | 3                | 4                  | 5                  | 6                    | 7                   | 8                    | 9                        | 10                    | 11                        | 12                                    |
|                                   | 517861           | 340247                 | 339620           | 508989             | 173616             | 339971               | 419752              | 173658               | 173635                   | 419758                | 517868                    | 419761                                |
| Function                          | Serine hydrolase | Beta-ketoacyl synthase | Acyl transferase | PKS with 5 domains | Acetyltrans ferase | Hypothetical protein | Amino acid permease | Hypothetical protein | Fungal cellulose binding | Hypotheti cal protein | Carbon nitrogen hydrolase | Fungal specific transcripti on factor |

Table S42. Tricho-HrPKS1 Predicted BGC.

| Tricho-HrPKS1<br>Predicted BGC |        |        |        |        |        |        |        |        |        |
|--------------------------------|--------|--------|--------|--------|--------|--------|--------|--------|--------|
| Protein ID                     | 1      | 2      | 3      | 4      | 5      | 6      | 7      | 8      | 9      |
|                                | 435166 | 474382 | 435173 | 435175 | 356492 | 435179 | 183129 | 182809 | 451770 |

|          |                                |                      |                                       |                       |                   |                      |                                       |                       |                          |
|----------|--------------------------------|----------------------|---------------------------------------|-----------------------|-------------------|----------------------|---------------------------------------|-----------------------|--------------------------|
| Function | major facilitator superfamily) | Transcription factor | Pyruvate/Phos phoenolpyruva te kinase | O- methyltransfer ase | Aminotransfer ase | Hypothetical protein | Pyruvate/Phos phoenolpyruva te kinase | Alcohol dehydrogenase | AMP-dependent synthetase |
|----------|--------------------------------|----------------------|---------------------------------------|-----------------------|-------------------|----------------------|---------------------------------------|-----------------------|--------------------------|

Table S43. Tricho-HrPKS2 Predicted BGC.

| Tricho-HrPKS2<br>Predicted BGC |                           |                      |                      |                 |                                      |                              |                                         |                      |
|--------------------------------|---------------------------|----------------------|----------------------|-----------------|--------------------------------------|------------------------------|-----------------------------------------|----------------------|
| Protein ID                     | 1                         | 2                    | 3                    | 4               | 5                                    | 6                            | 7                                       | 8                    |
|                                | 479203                    | 420937               | 503349               | 509354          | 395107                               | 369895                       | 395113                                  | 369902               |
| Function                       | AMP- dependent synthetase | Hypothetical protein | Hypothetical protein | FOG: Zn- finger | Short-chain dehydrogenas e/reductase | Voltage-gated shaker-like K+ | Zn(2)-C6 fungal-type DNA-binding domain | Hypothetical protein |

Table S44. Tricho-HrPKS3 Predicted BGC.

| Tricho-HrPKS3<br>Predicted BGC |                    |                         |                           |                          |                         |                        |                         |                 |                   |                 |               |                         |                         |                        |                         |               |                          |                 |
|--------------------------------|--------------------|-------------------------|---------------------------|--------------------------|-------------------------|------------------------|-------------------------|-----------------|-------------------|-----------------|---------------|-------------------------|-------------------------|------------------------|-------------------------|---------------|--------------------------|-----------------|
| Protein ID                     | 1                  | 2                       | 3                         | 4                        | 5                       | 6                      | 7                       | 8               | 9                 | 10              | 11            | 12                      | 13                      | 14                     | 15                      | 16            | 17                       | 18              |
|                                | 468797             | 204429                  | 420683                    | 420688                   | 204542                  | 468801                 | 457203                  | 394862          | 502071            | 468805          | 468806        | 394863                  | 502078                  | 502080                 | 420699                  | 502081        | 479111                   | 340292          |
| Function                       | Sugar trans porter | Hypo thetic al protei n | Multi ple inosit ol polyp | Alph a- isopr opyl malat | Mono carbo xylate trans | Trans cripti on factor | Hypo thetic al protei n | AMP- depe ndent | Cytoc hrom e P450 | Mono oxyge nase | Alcoh ol dehy | Hypo thetic al protei n | O- meth yltran sferas e | Trans cripti on factor | Hypo thetic al protei n | FAD- bindi ng | Alcoh ol dehy droge nase | Cytochrome P450 |

|  |  |  |                                     |                   |            |  |  |                |  |  |               |  |  |  |  |  |  |
|--|--|--|-------------------------------------|-------------------|------------|--|--|----------------|--|--|---------------|--|--|--|--|--|--|
|  |  |  | hosp<br>hate<br>phos<br>phata<br>se | e<br>synth<br>ase | porte<br>r |  |  | synth<br>etase |  |  | droge<br>nase |  |  |  |  |  |  |
|--|--|--|-------------------------------------|-------------------|------------|--|--|----------------|--|--|---------------|--|--|--|--|--|--|

Table S45. Tricho-HrPKS4 Predicted BGC.

| Tricho-HrPKS4<br>Predicted BGC |                              |                                    |                                                 |                          |
|--------------------------------|------------------------------|------------------------------------|-------------------------------------------------|--------------------------|
| Protein ID                     | 1                            | 2                                  | 3                                               | 4                        |
|                                | 480138                       | 519257                             | 489253                                          | 480140                   |
| Function                       | Alcohol<br>dehydrogenas<br>e | Kynurenine 3-<br>monooxygena<br>se | Iron/ascorbate<br>family<br>oxidoreductas<br>es | AMP-dependent synthetase |

Table S46. Tricho-HrPKS5 Predicted BGC.

| Tricho-HrPKS5<br>Predicted BGC |              |                     |                      |                      |                      |                      |              |                       |                        |                      |                          |                      |                 |
|--------------------------------|--------------|---------------------|----------------------|----------------------|----------------------|----------------------|--------------|-----------------------|------------------------|----------------------|--------------------------|----------------------|-----------------|
| Protein ID                     | 1            | 2                   | 3                    | 4                    | 5                    | 6                    | 7            | 8                     | 9                      | 10                   | 11                       | 12                   | 13              |
|                                | 458800       | 480482              | 490661               | 446617               | 424283               | 424284               | 344520       | 398199                | 344462                 | 344513               | 470168                   | 344535               | 398203          |
| Function                       | Flavo<br>nol | Short<br>-<br>chain | Gluta<br>thion<br>e- | Hypo<br>thetic<br>al | Hypo<br>thetic<br>al | Hypo<br>thetic<br>al | Aspa<br>rtyl | AMP-<br>depe<br>ndent | Gluta<br>thion<br>e S- | Hypo<br>thetic<br>al | Major<br>facilit<br>ator | Alde<br>hyde<br>dehy | Cytochrome P450 |

|  |               |                       |                                                                        |             |             |             |              |                |                 |             |                     |               |  |
|--|---------------|-----------------------|------------------------------------------------------------------------|-------------|-------------|-------------|--------------|----------------|-----------------|-------------|---------------------|---------------|--|
|  | reduc<br>tase | dehy<br>droge<br>nase | depe<br>ndent<br>forma<br>ldehy<br>de-<br>activa<br>ting<br>enzy<br>me | protei<br>n | protei<br>n | protei<br>n | prote<br>ase | synth<br>etase | transf<br>erase | protei<br>n | super<br>famil<br>y | droge<br>nase |  |
|--|---------------|-----------------------|------------------------------------------------------------------------|-------------|-------------|-------------|--------------|----------------|-----------------|-------------|---------------------|---------------|--|

Table S47. Tricho-HrPKS6 Predicted BGC.

| Tricho-HrPKS6<br>Predicted BGC |                    |                          |                                                  |                                  |                          |                       |
|--------------------------------|--------------------|--------------------------|--------------------------------------------------|----------------------------------|--------------------------|-----------------------|
| Protein ID                     | 1                  | 2                        | 3                                                | 4                                | 5                        | 6                     |
|                                | 475760             | 504253                   | 504256                                           | 475763                           | 504262                   | 360640                |
| Function                       | Cytochrome<br>P450 | Acetylcholines<br>terase | Zn(2)-C6<br>fungal-type<br>DNA-binding<br>domain | Short-chain<br>dehydrogenas<br>e | AMP-dependent synthetase | Alcohol dehydrogenase |

Table S48. Tricho-TC1 Predicted BGC.

| Tricho-TC1<br>Predicted BGC |        |        |        |        |        |        |
|-----------------------------|--------|--------|--------|--------|--------|--------|
| Protein ID                  | 1      | 2      | 3      | 4      | 5      | 6      |
|                             | 500701 | 356522 | 500708 | 500710 | 500717 | 500722 |

|          |                          |                   |                    |                  |                                   |                 |
|----------|--------------------------|-------------------|--------------------|------------------|-----------------------------------|-----------------|
| Function | Glutathion S-transferase | Sugar transporter | Glycosyl hydrolase | Terpene synthase | Capsular polysaccharide synthesis | Cytochrome P450 |
|----------|--------------------------|-------------------|--------------------|------------------|-----------------------------------|-----------------|

Table S49. Tricho-TC2 Predicted BGC.

| Tricho-TC2<br>Predicted BGC |                 |                  |
|-----------------------------|-----------------|------------------|
| Protein ID                  | 1               | 2                |
|                             | 514100          | 501120           |
| Function                    | Cytochrome P450 | Terpene synthase |

Table S50. Tricho-TC3 Predicted BGC.

| Tricho-TC3<br>Predicted BGC |                                     |                        |                      |                      |                         |
|-----------------------------|-------------------------------------|------------------------|----------------------|----------------------|-------------------------|
| Protein ID                  | 1                                   | 2                      | 3                    | 4                    | 5                       |
|                             | 406447                              | 160738                 | 433134               | 522997               | 354266                  |
| Function                    | NAD dependent epimerase/dehydratase | Dienelactone hydrolase | Hypothetical protein | Hypothetical protein | Terpene synthase family |



**Table S51.** Tricho-TC4 Predicted BGC.

| Tricho-TC4<br>Predicted BGC |                  |                      |             |                      |                      |                   |                  |                  |                      |                           |
|-----------------------------|------------------|----------------------|-------------|----------------------|----------------------|-------------------|------------------|------------------|----------------------|---------------------------|
| Protein ID                  | 1                | 2                    | 3           | 4                    | 5                    | 6                 | 7                | 8                | 9                    | 10                        |
|                             | 403973           | 403974               | 130100      | 351573               | 351479               | 512447            | 351344           | 130112           | 378819               | 482873                    |
| Function                    | Terpene synthase | Hypothetical protein | FAD binding | Hypothetical protein | Alpha-beta hydrolase | Major facilitator | NmrA-like family | WD,G-beta repeat | Hypothetical protein | Glutathione S-transferase |

**Table S52.** Tricho-TC5 Predicted BGC.

| Tricho-TC5<br>Predicted BGC |                        |                      |                      |                      |                      |                  |
|-----------------------------|------------------------|----------------------|----------------------|----------------------|----------------------|------------------|
| Protein ID                  | 1                      | 2                    | 3                    | 4                    | 5                    | 6                |
|                             | 424392                 | 490911               | 490920               | 344624               | 490924               | 344808           |
| Function                    | Metallo-beta-lactamase | Hypothetical protein | Hypothetical protein | Hypothetical protein | Hypothetical protein | Terpene synthase |

**Table S53.** Tricho-DMAT Predicted BGC.

| Tricho-DMAT<br>Predicted BGC |                      |                      |                   |                   |                   |                |                 |                             |                      |               |                                |
|------------------------------|----------------------|----------------------|-------------------|-------------------|-------------------|----------------|-----------------|-----------------------------|----------------------|---------------|--------------------------------|
| Protein ID                   | 1                    | 2                    | 3                 | 4                 | 5                 | 6              | 7               | 8                           | 9                    | 10            | 11                             |
|                              | 57371                | 470720               | 57387             | 425630            | 399440            | 374262         | 425637          | 470726                      | 425640               | 57476         | 425644                         |
| Function                     | Zn(2)-C6 fungal-type | Hypothetical protein | Renal dipeptidase | Major facilitator | Methyltransferase | Glutathione S- | Cytochrome P450 | Aromatic prenyltransferase, | Aminocyclopropane-1- | Non-ribosomal | Pyridine nucleotide-disulphide |

---

|  |                    |  |  |             |  |             |  |            |                      |                    |                |
|--|--------------------|--|--|-------------|--|-------------|--|------------|----------------------|--------------------|----------------|
|  | DNA-binding domain |  |  | superfamily |  | transferase |  | DMATS type | carboxylase synthase | peptide synthetase | oxidoreductase |
|--|--------------------|--|--|-------------|--|-------------|--|------------|----------------------|--------------------|----------------|
